# Supplementary material for: Facile fabrication of an “off–on” photoelectrochemical aptasensor for kanamycin detection based on polypyrrole/CeO2
Source: Royal Society of Chemistry journal article supplement (doi:10.1039/c7ay01611e), 2017-01-01
Supplement: c7ay01611e1.pdf [file c7ay01611e1.pdf]

Supplementary Information

**Facile fabrication of "off-on" photoelectrochemical aptasensor  
for kanamycin detection based on polypyrrole/CeO<sub>2</sub>**

Jiixin Lv, Qin Lei, Qiyu Xiao, Xiaomin Li, Yujie Huang, He Li\*

School of Chemistry & Environment, South China Normal University, Guangzhou 510006 China

Guangzhou Key Laboratory of Analytical Chemistry for Biomedicine, Guangzhou 510006 China

\* Corresponding author.

E-mail: [analchemlh@163.com](mailto:analchemlh@163.com) (He Li);

Tel: +86-020-39310257; Fax:+86-020-39310187

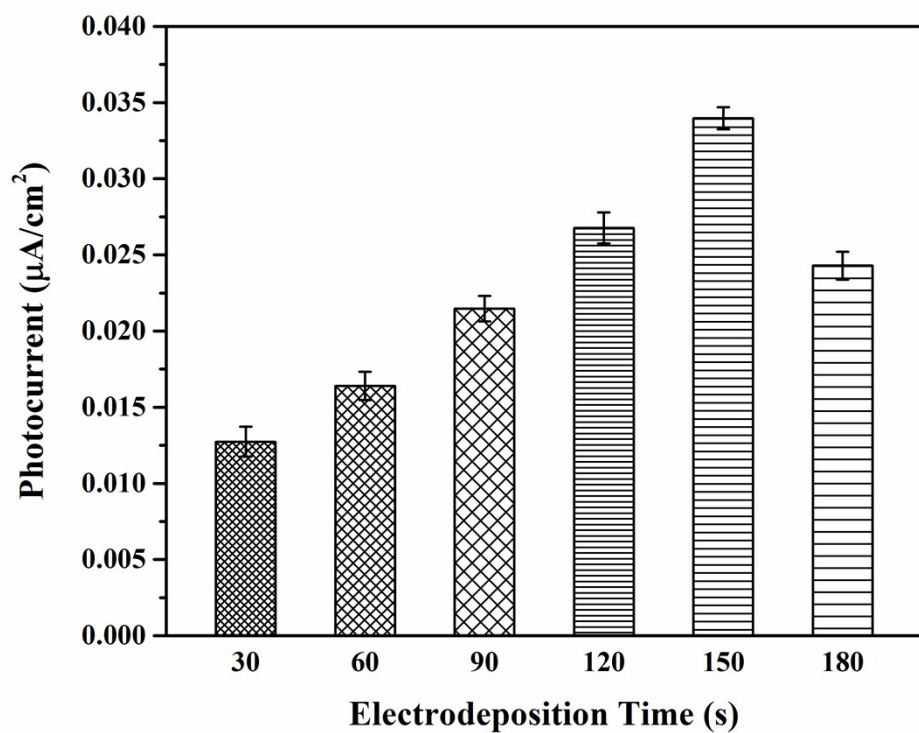

**Fig. S1** Effects of CeO<sub>2</sub> deposition time on the photocurrent responses

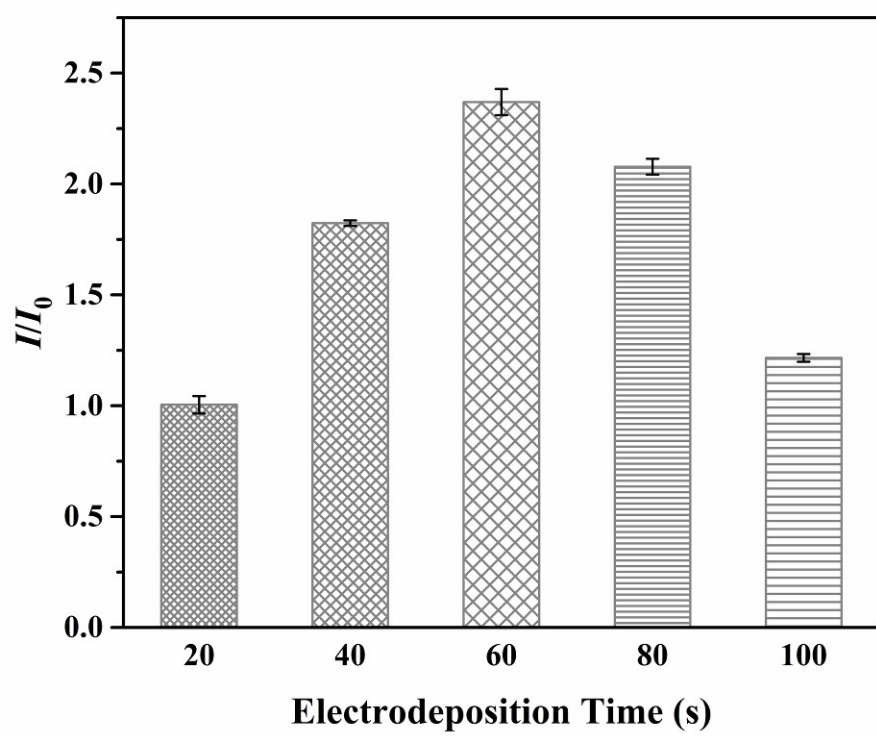

**Fig. S2** Effects of polypyrrole deposition time on the photocurrent responses

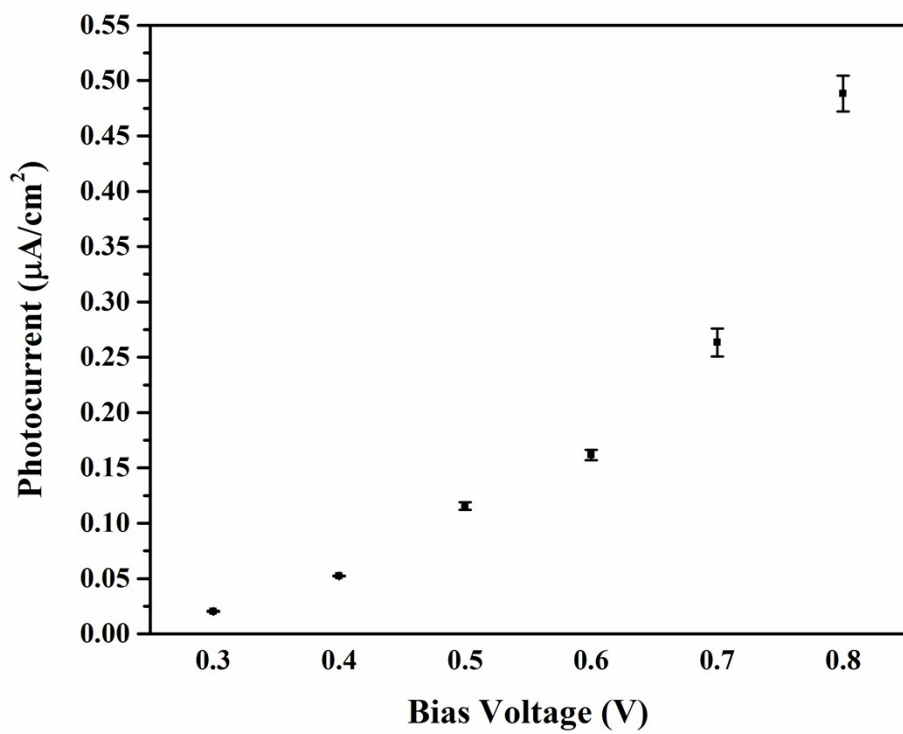

Fig. S3 Influences of bias potential on PEC responses of apt/Au/Ppy/CeO<sub>2</sub>/ITO

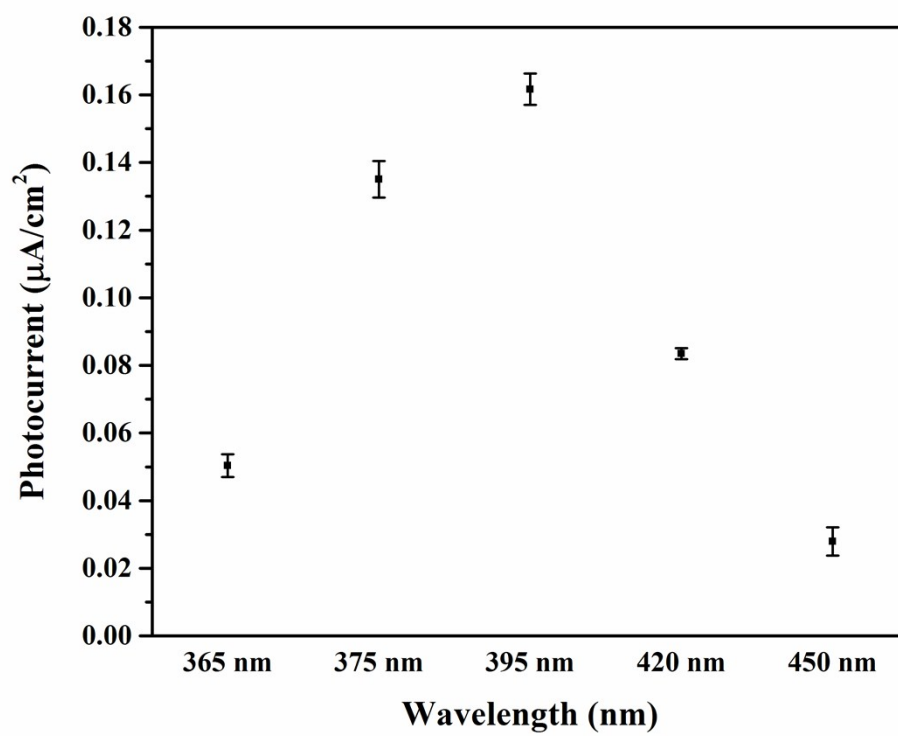

**Fig. S4** Influences of the wavelength of exciting light on PEC responses of apt/Au/Ppy/CeO<sub>2</sub>/ITO

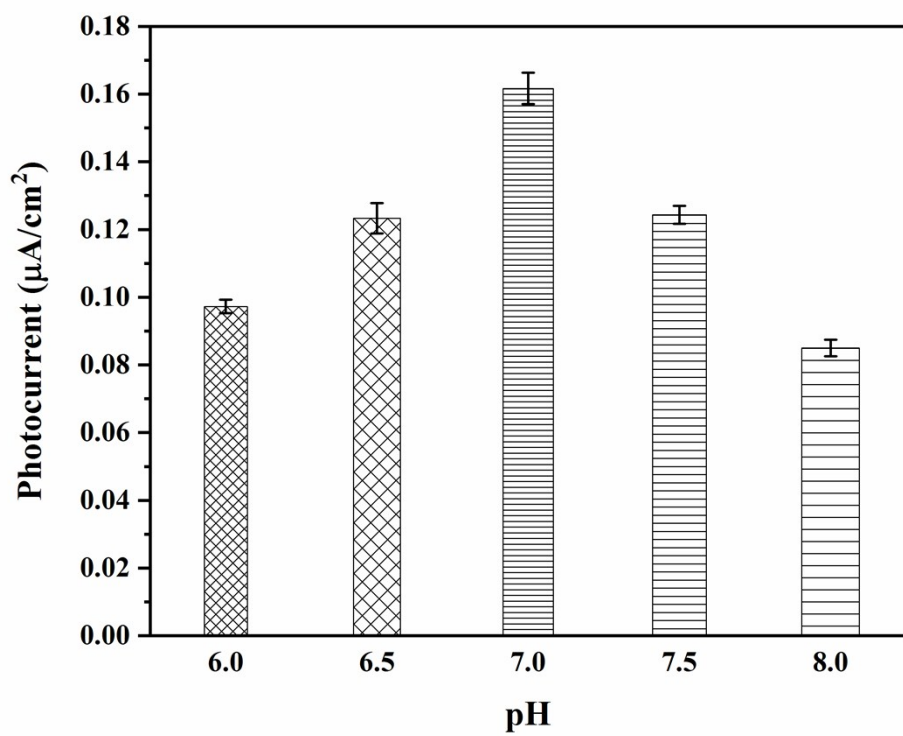

Fig. S5 Optimization of electrolyte pH

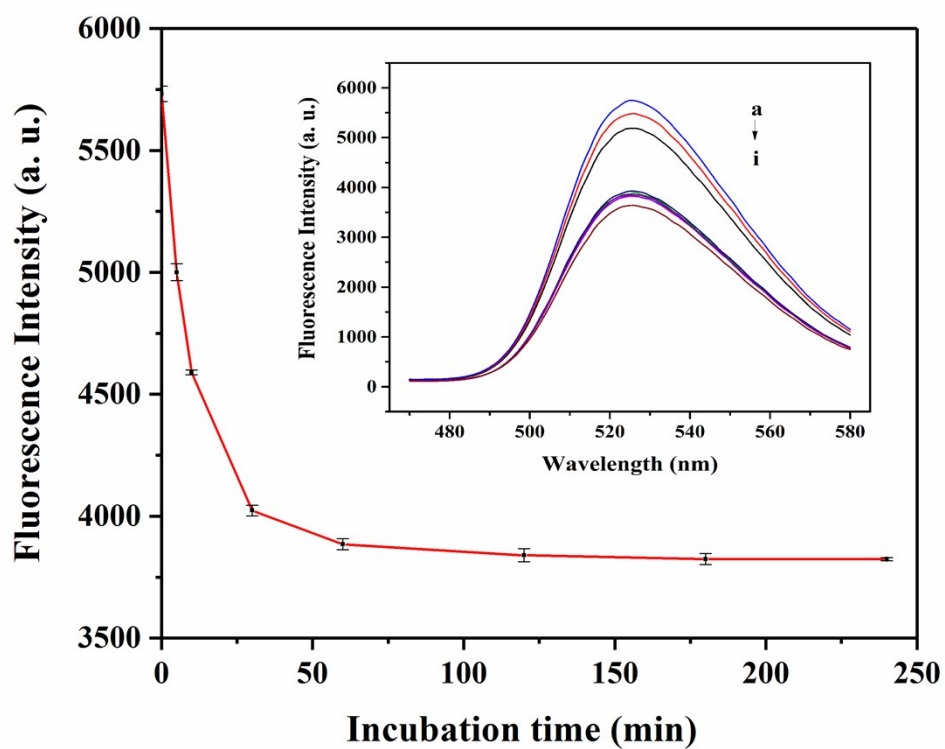

**Fig. S6** Optimization of incubation time. Inset: Effects of incubation time on fluorescence responses (a) 0 min, (b) 5 min, (c) 10 min, (d) 30 min, (e) 60 min, (f) 120 min, (g) 180 min, (h) 240 min. (i) sterile water combines with 4S Green Plus.

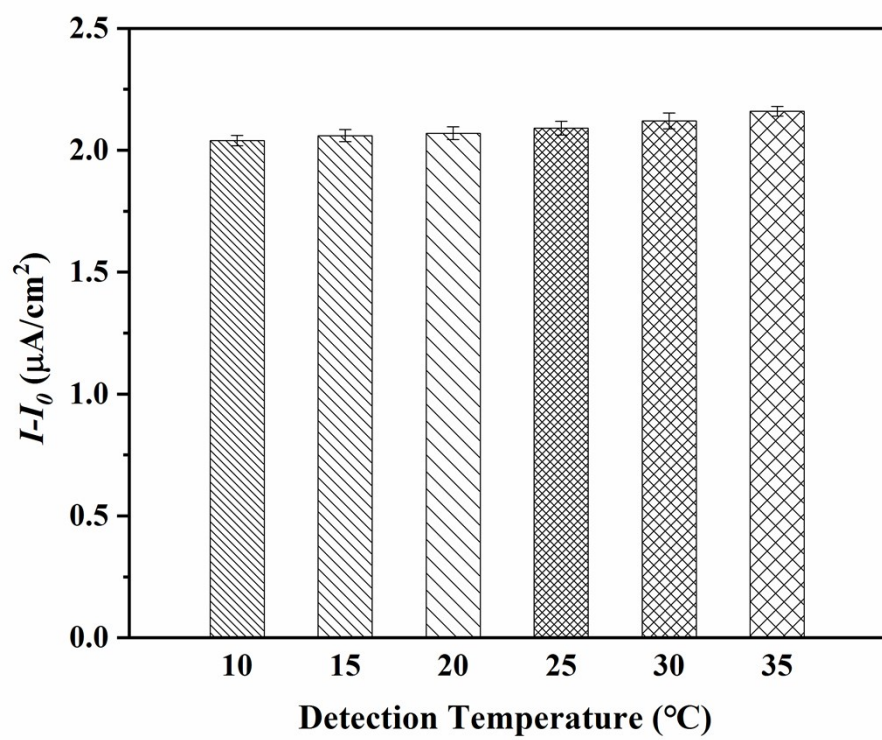

**Fig. S7** Optimization of detection temperature.



**Table S1** Comparison of different methods for kanamycin determination

| Detection methods        | Liner range ( $\mu\text{g/L}$ )           | Detection limit ( $\mu\text{g/L}$ ) | Reference |
|--------------------------|-------------------------------------------|-------------------------------------|-----------|
| Electrochemiluminescence | 2 ~ 100                                   | 0.67                                | [1]       |
| Electrochemiluminescence | $8.7 \times 10^{-2} \sim 9.9 \times 10^7$ | $2.6 \times 10^{-2}$                | [2]       |
| Colorimetry              | 200 ~ 2000                                | 39                                  | [3]       |
| Colorimetry              | 50 ~ 600                                  | 2.6                                 | [4]       |
| Fluorescence             | 0.174 ~ 26.1                              | 0.070                               | [5]       |
| Fluorescence             | 0.29 ~ 11.6                               | 0.13                                | [6]       |
| Electrochemistry         | 0.010 ~ 150                               | 0.005                               | [7]       |
| Electrochemistry         | 0.0005 ~ 50                               | 0.00042                             | [8]       |
| Photoelectrochemistry    | 0.58 ~ 134                                | 0.12                                | [9]       |
| Photoelectrochemistry    | 0.12 ~ 117                                | 0.06                                | [10]      |
| Photoelectrochemistry    | 0.5 ~ 200                                 | 0.2                                 | This work |

## References

- [1] H. Wang, W. Wu, D. Wei, Z. Guo, S. Wang, *J. Electroanal. Chem.*, 2014, **735**,136-141.
- [2] M. Zhao, Y. Zhuo, Y. Chai, R. Yuan, *Biomaterials*, 2015, **52**, 476-483.
- [3] Y. Luo, J. Xu, Y. Li, H. Gao, J. Guo, F. Shen, C. Sun, *Food Control*, 2015, **54**, 7-15.
- [4] Y. Xu, T. Han, X. Li, L. Sun, Y. Zhang, Y. Zhang, *Anal. Chim. Acta*, 2015, **891**, 298-303.
- [5] Z. Liu, C. Tian, L. Lu, X. Su, *RSC Adv.*, 2016, **6**, 10205-10214.
- [6] M. Ramezani, N.M. Danesh, P. Lavaee, K. Abnous, S.M. Taghdisi, *Sensor. Actuat. B-Chem.*,2016, **222**, 1-7.
- [7] H. Song, T. Kang, N. Li, L. Lu, S. Cheng, *Anal. Methods*, 2016, **8**, 3366-3372.
- [8] X. Qin, Y. Yin, H. Yu, W. Guo, M. Pei, *Biosens. Bioelectron.*, 2016, **77**, 752-758.
- [9] R. Li, Y. Liu, L. Cheng, C. Yang, J. Zhang, *Anal. Chem.*, 2014, **86**, 9372-9375.
- [10] Y. Xin, Z. Li, Z. Zhang, *Chem. Commun.*, 2015, **51**, 15498-15501.
